# Supplementary figures and images for: Phenotypic and Functional Changes of Endothelial and Smooth Muscle Cells in Thoracic Aortic Aneurysms
Source: Hindawi journal article supplement (doi:10.1155/2016/3107879), 2016-01-01

A

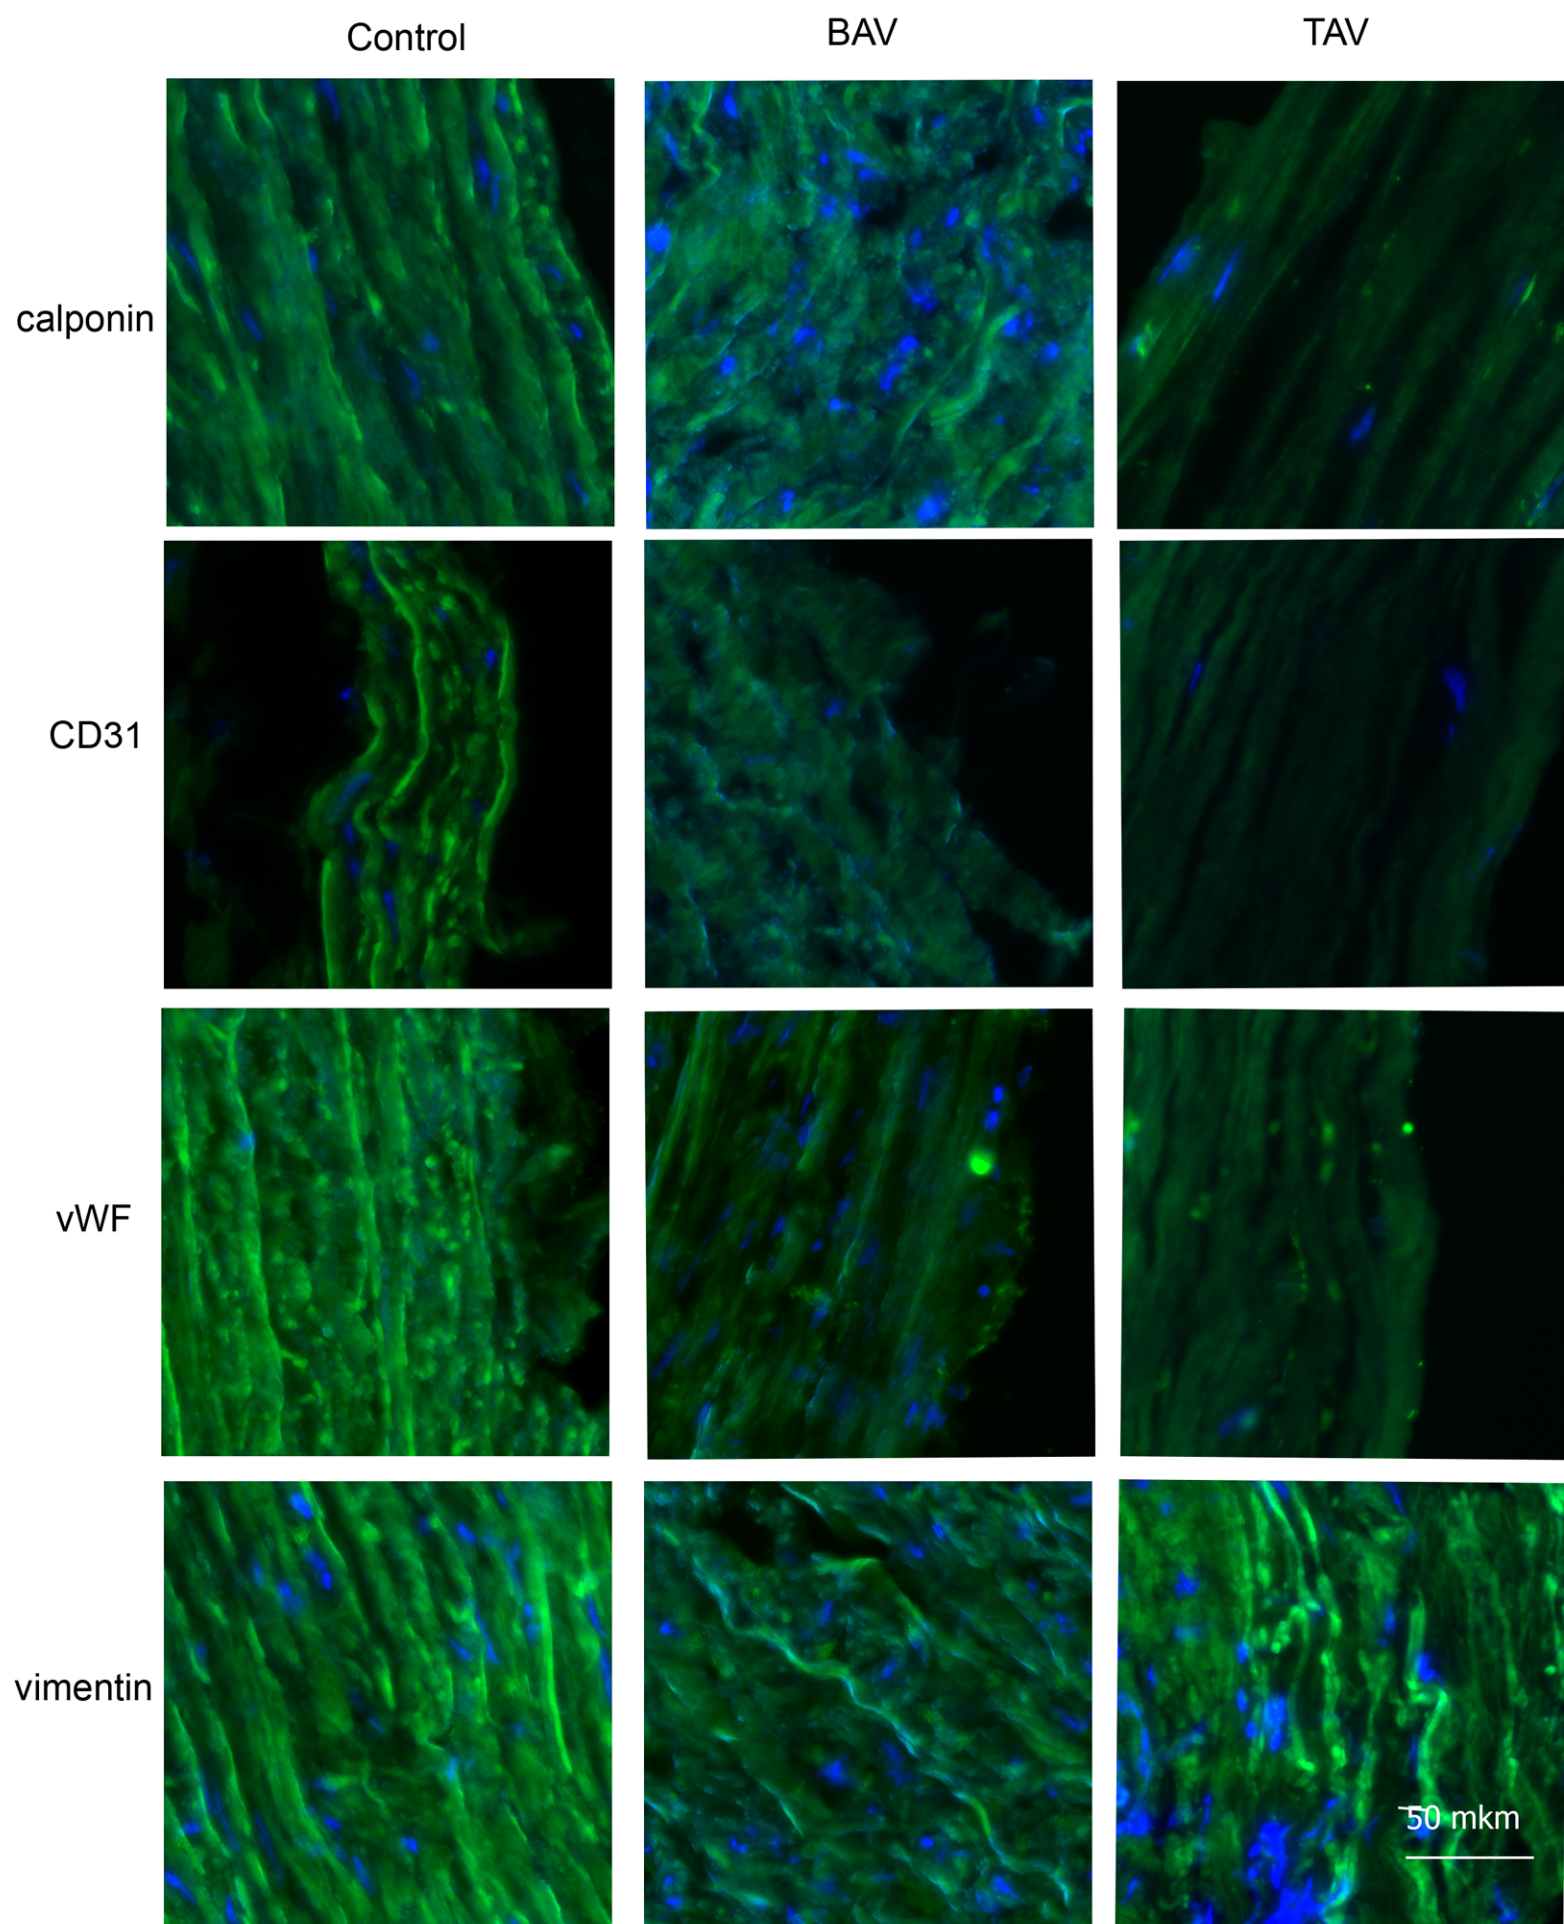

Supplement: f1 [file 3107879.f1.zip]

B

control

BAV

TAV

SM22

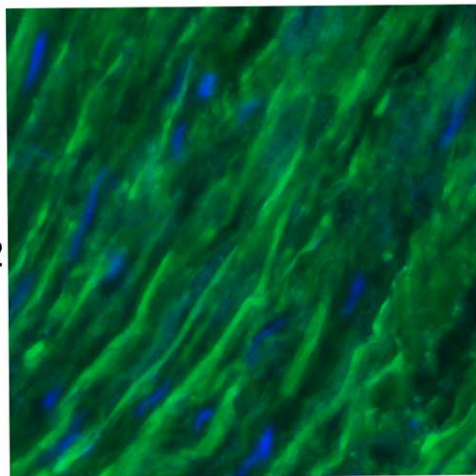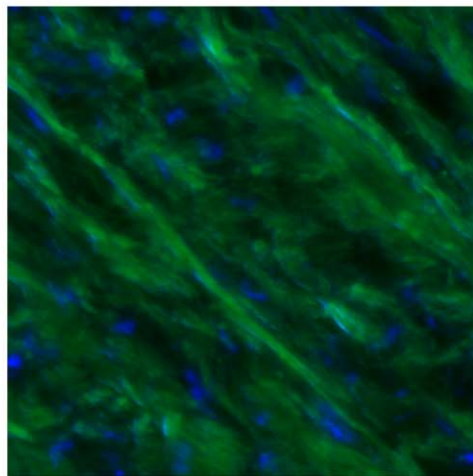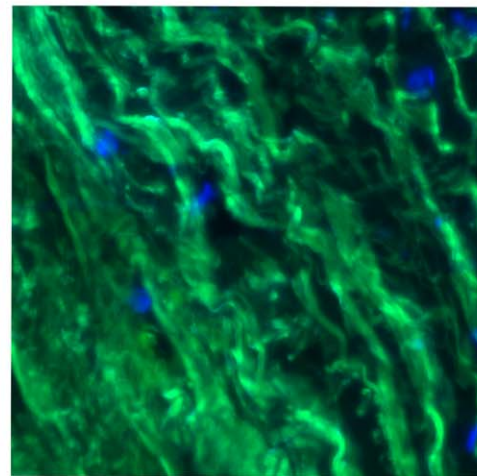

SMA

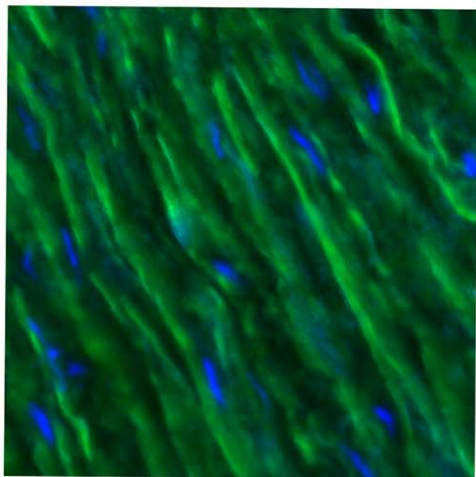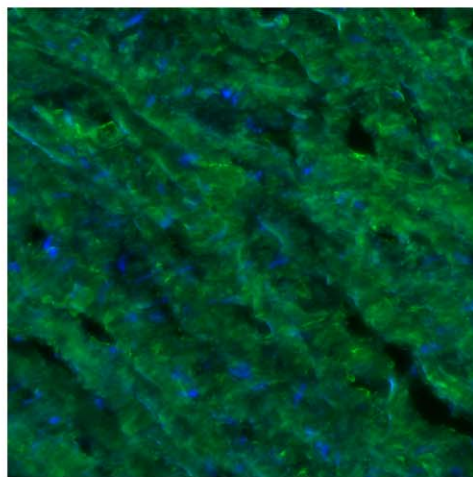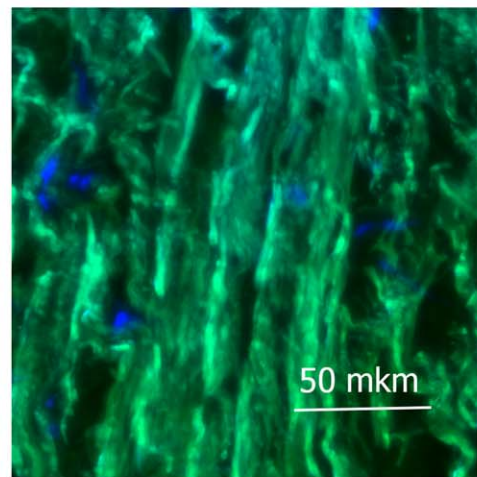

Supplement: f1 [file 3107879.f1.zip]

A

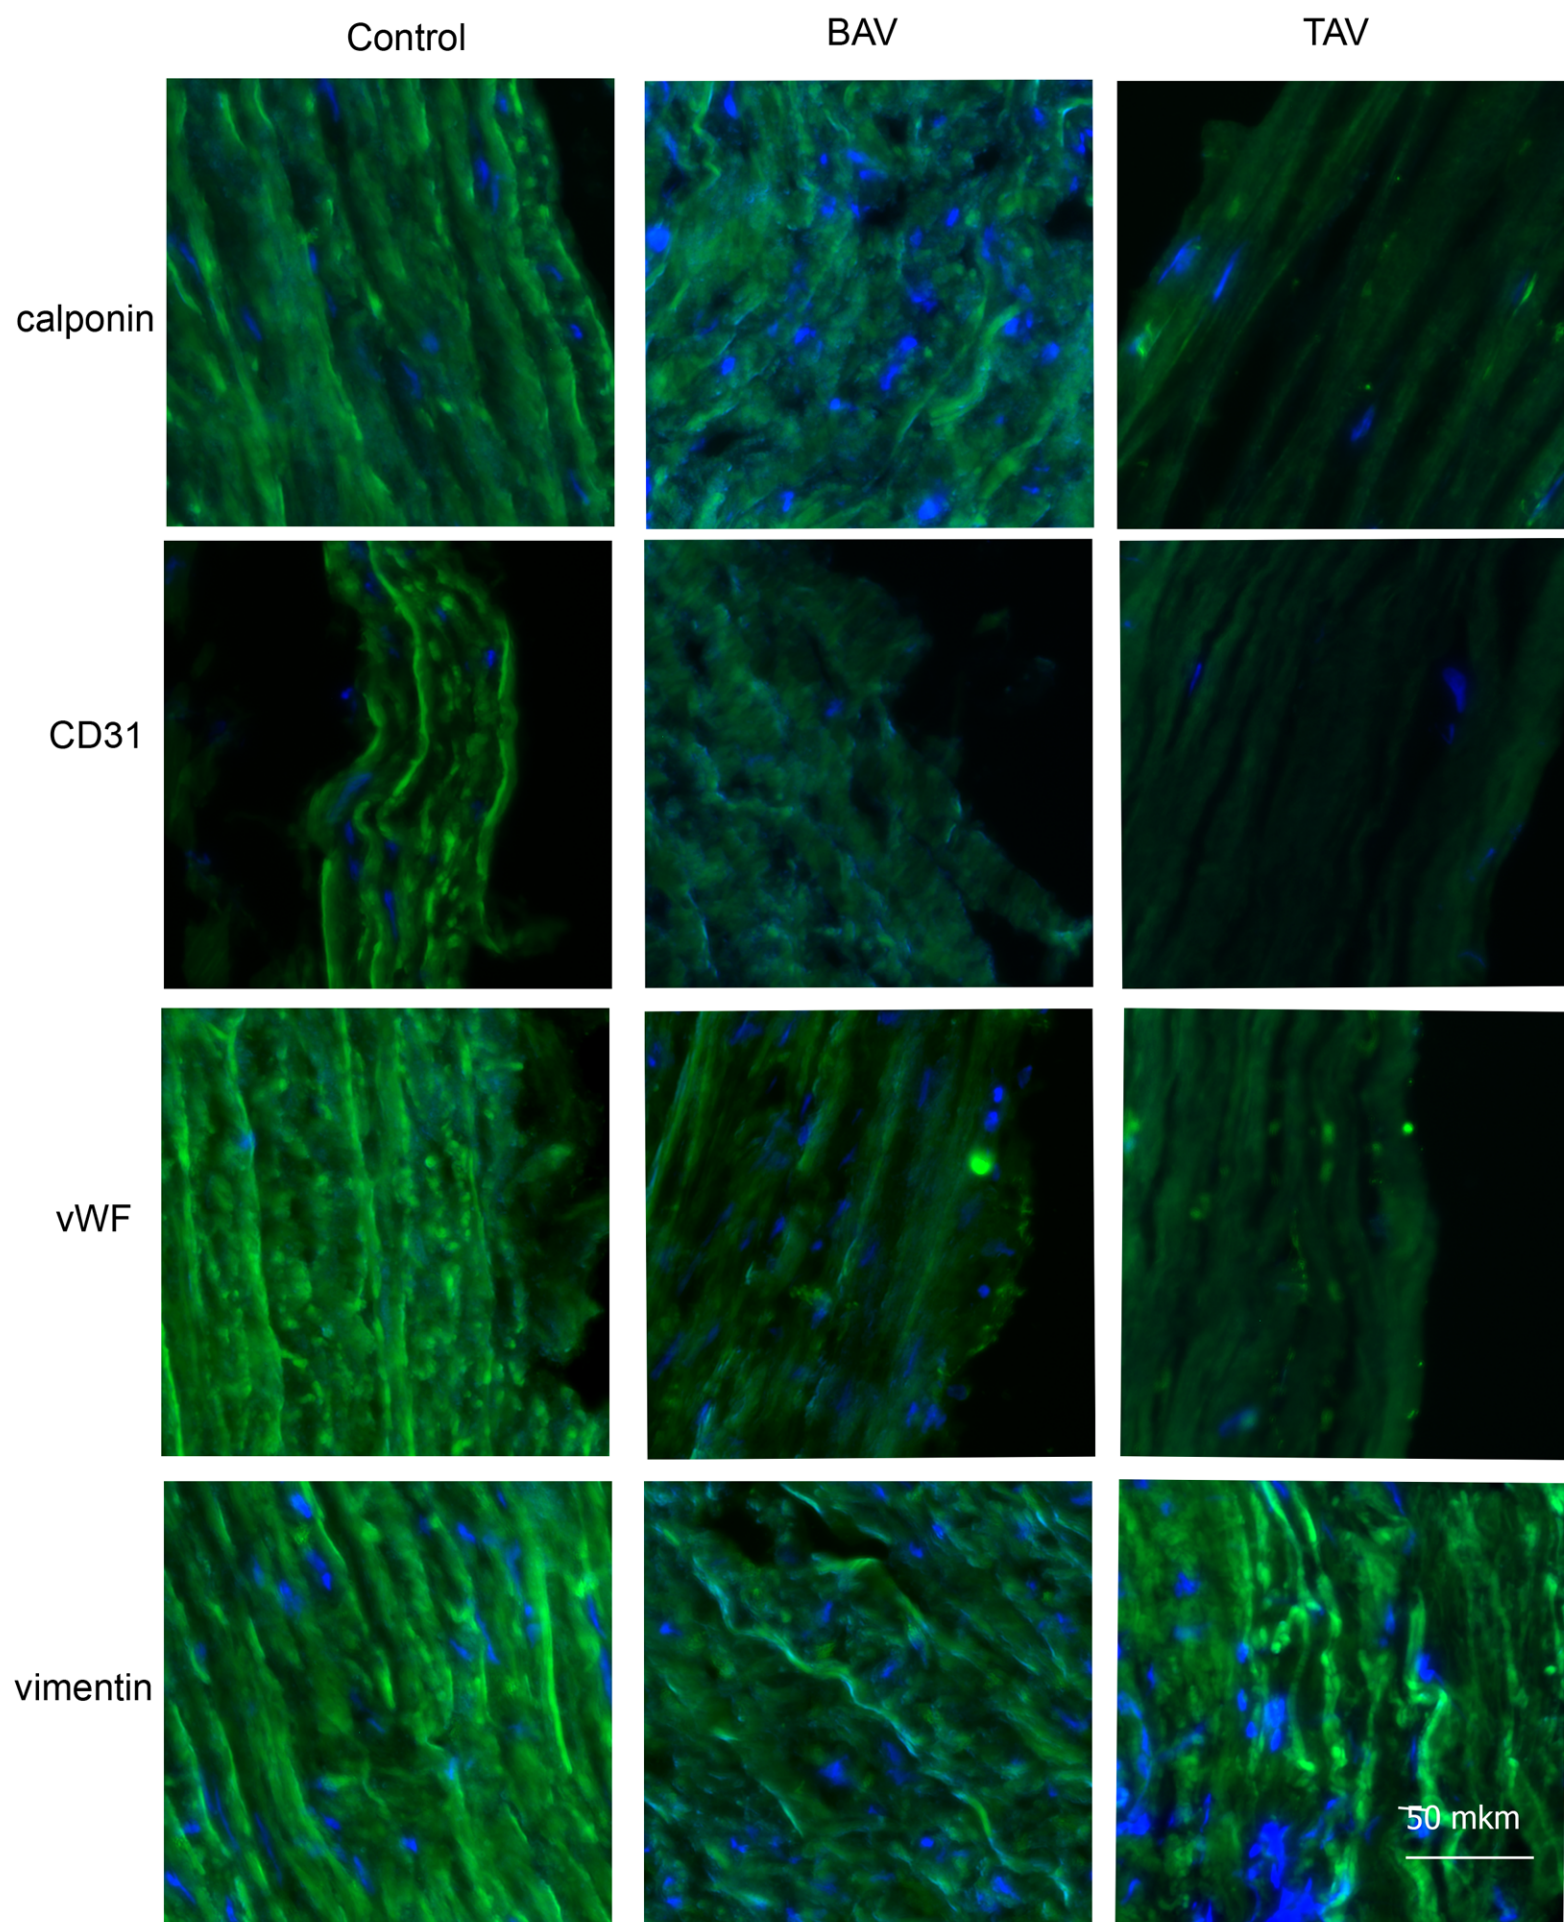

Supplement: f1 [file 3107879.f1.zip]

B

control

BAV

TAV

SM22



SMA



Supplement: f1 [file 3107879.f1.zip]
